# Supplementary material
Source: publisher site journal article supplement (https://www.spandidos-publications.com/5564/downloadSupplementary)

Figure S1. Establishment of highly metastatic TNBC 4T1-L8 cells from 4T1 cells. Parental 4T1 and 4T1-L8 cells were injected into the tail vein of BALB/c mice. Metastasis in the lung was monitored using IVIS. After 8 days, the mice were sacrificed, and the number of metastatic nodules in the lungs was counted. The results are expressed as the mean  $\pm$  SD. \* $P < 0.05$ , compared with 4T1 cells.

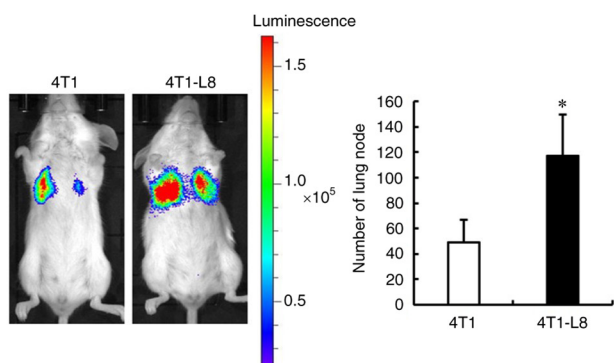

Supplement: Supplementary file 1 [file downloadSupplementary]
